# Supplementary material
Source: Royal Society of Chemistry journal article supplement (doi:10.1039/d6an00156d)
Supplement: d6an00156d1.pdf [file d6an00156d1.pdf]

# Design of “Turn-on” Colorimetric Sensor for AChE inhibitor on the stability of Metal-Organic Frameworks

Jun Zhang,<sup>[a]</sup> Wenzhu Jiang, Zhiping Xu<sup>[a], [a]</sup> Lin Zhang\*<sup>[a]</sup>

[a] *Shenyang Key Laboratory of Medical Molecular Theranostic Probes in School of Pharmacy, Shenyang Medical College, Shenyang 110034, China.*

Corresponding Authors: E-mail: [zl210503@163.com](mailto:zl210503@163.com)

## Table of content:

|                           |   |
|---------------------------|---|
| Supplementary Figure..... | 2 |
| Supplementary Tables..... | 2 |
| References.....           | 3 |

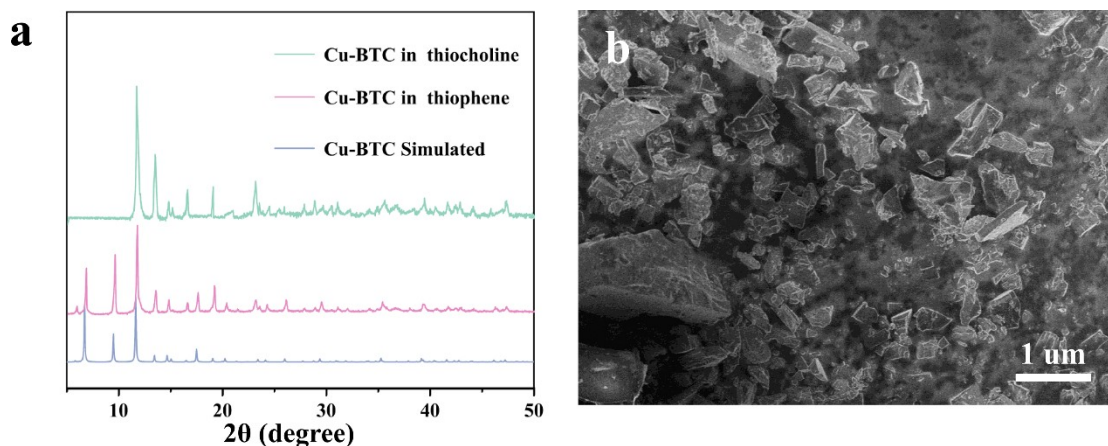

Fig. S1. (a) PXRD patterns after incubation with thiocholine and thioephene. (b) SEM image of Cu-BTC after incubation with thiocholine.

**Table S1.** Sensing performance comparison between the biosensors in this work and some reported sensors for AChE inhibitors.

| Biosensor         | Analyte      | Linear range                          | Detection limit | Reference |
|-------------------|--------------|---------------------------------------|-----------------|-----------|
| colorimetric      | galanthamine | 25 nM-25 $\mu$ M                      | 4.8 nM          | 1         |
| fluorometric      | carbaryl     | 0.05–50 $\mu$ M                       | 0.8 nM          | 2         |
| colorimetric      | carbaryl     | 0.05–50 $\mu$ M                       | 1.6 nM          | 2         |
| chemiluminescence | tacrine      | 0- 0.78 $\mu$ M                       | 21.9 nM         | 3         |
| fluorometric      | fenitrothion | 0.1 - 500 ng/mL                       | 0.037 ng/mL     | 4         |
| colorimetric      | huperzine A  | 5–500 nM                              | 4.17 nM         | 5         |
| colorimetric      | paraoxon     | 0–30 ng mL <sup>-1</sup>              | 1.07 ng/mL      | 6         |
| colorimetric      | clorpyrifos  | 10 <sup>-11</sup> -10 <sup>-4</sup> M | 8.95 pM         | this work |

**Table S2.** Recovery tests of clorpyrifos detection in apple samples.

| Samples | Added (pM) | Found (pM) | Recovery (%) | RSD (%) |
|---------|------------|------------|--------------|---------|
| 1       | 100.00     | 109.81     | 109.81       | 2.05    |
| 2       | 500.00     | 504.22     | 100.85       | 2.32    |
| 3       | 5000.00    | 5089.10    | 101.78       | 1.90    |
| 4       | 100000.00  | 100749.21  | 100.75       | 1.77    |
| 5       | 1000000.00 | 988299.62  | 98.83        | 2.57    |

## References

- [1] Y. N. Li, Z. N. Qian, C. Y. Shen, Z. Y. Gao, K. Tang, Z. Y. Liu, Z. B. Chen, Colorimetric sensors for alkaloids based on the etching of Au@MnO<sub>2</sub> nanoparticles and MnO<sub>2</sub> nanostars, *ACS Appl. Nano Mater.*, 2021, **4**, 8465–8472.
- [2] D. H. Wu, Q. L. Zhao, Y. Wang, B. Zhang, X. Q. Tang, J. Talap, J. Sun, X.R. Yang, Fluorescent iron-doped polymer dot nanozyme-based cascade system for dual-mode detection of acetylcholinesterase activity and its inhibitors, *Anal. Chem.*, 2024, **96**, 15682–15691.
- [3] Y. P. Lai, S. S. He, Y. Y. Chen, T. R. Lin, L. Hou, S. L. Zhao, Hydrogen-Bonded organic framework nanozyme with multi enzyme activity for chemiluminescence sensing of acetylcholinesterase and screening its inhibitors, *Anal. Chem.*, 2025, **97**, 8362–8369.
- [4] L. Wang, Y. Pan, Z. W. Wang, Y. F. Wang, X. L. Wei, Ultrasensitive fluorescence platform based on AgNPs in situ incorporated Zr-MOFs for the detection of organophosphorus pesticides, *ACS Appl. Mater. Interfaces*, 2023, **15**, 44109–44118.
- [5] Y. W. Mao, J. Zhang, R. Zhang, J. Q. Li, A. J. Wang, X. C. Zhou, J. J. Feng, N-Doped carbon nanotubes supported Fe–Mn dual-single-atoms nanozyme with synergistically enhanced peroxidase activity for sensitive colorimetric detection of acetylcholinesterase and its Inhibitor, *Anal. Chem.*, 2023, **95**, 8640–8648.
- [6] D. W. Liang, Y. W. Wang, L. R. Ma, Y. L. Liu, R. J. Fu, H. R. Liu, Y. L. Peng, Y. H. Zhang, C. Q. Wang, B. N. Jiao, Y. He, Controlled growth of gold nanobipyramids using thiocholine for plasmonic colorimetric detection of organophosphorus pesticides, *ACS Appl. Nano Mater.*, 2022, **5**, 16978–16986.
